# Supplementary material
Source: MDPI journal article supplement (https://www.mdpi.com/2227-9040/10/11/457)
Supplement: s1 [file s1]

## **Supplementary Information**

### **Adamantane three-dimensional porous organic framework as a fluorescence sensor for rapid determination of tetracycline in aquatic products**

Zhenyu Lu, Yufei Hu, Gongke Li\* and Ling Xia

School of Chemistry, Sun Yat-sen University, Guangzhou 510006, China.

\*Corresponding Authors

E-mail: cesgkl@mail.sysu.edu.cn;

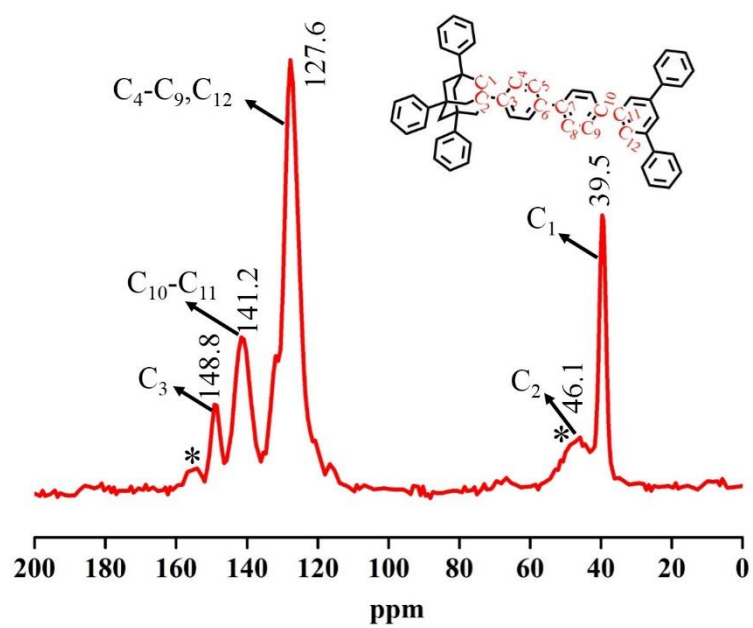

Figure S1.  $^{13}\text{C}$  CP/MAS NMR spectrum of AdaPOF

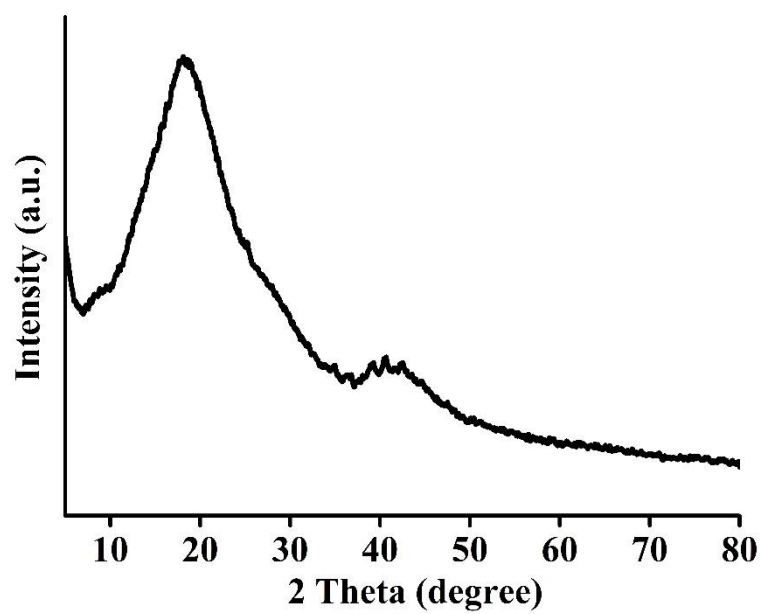

Figure S2. XRD pattern of AdaPOF

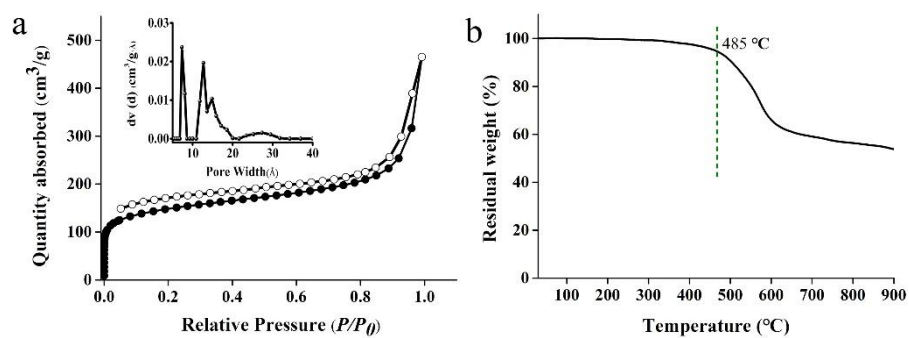

Figure S3. (a) N<sub>2</sub> adsorption-desorption isotherms and pore size distribution of AdaPOF; (b) TGA curve of AdaPOF

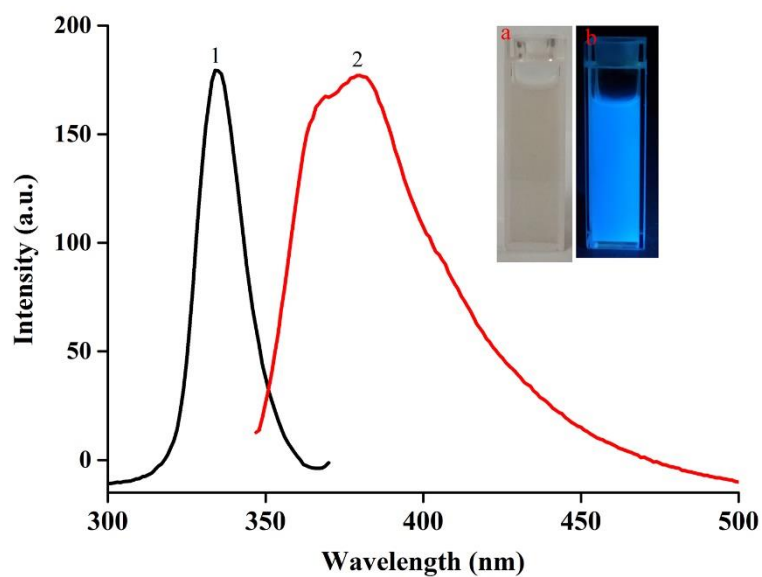

Figure S4. The excitation and emission spectra of suspension solution of AdaPOF ( $\lambda_{\text{ex}}=334$  nm). (Illustrations a, b are sunlight and fluorescent photographs of suspension solution of AdaPOF,  $\lambda_{\text{ex}}=365$  nm)

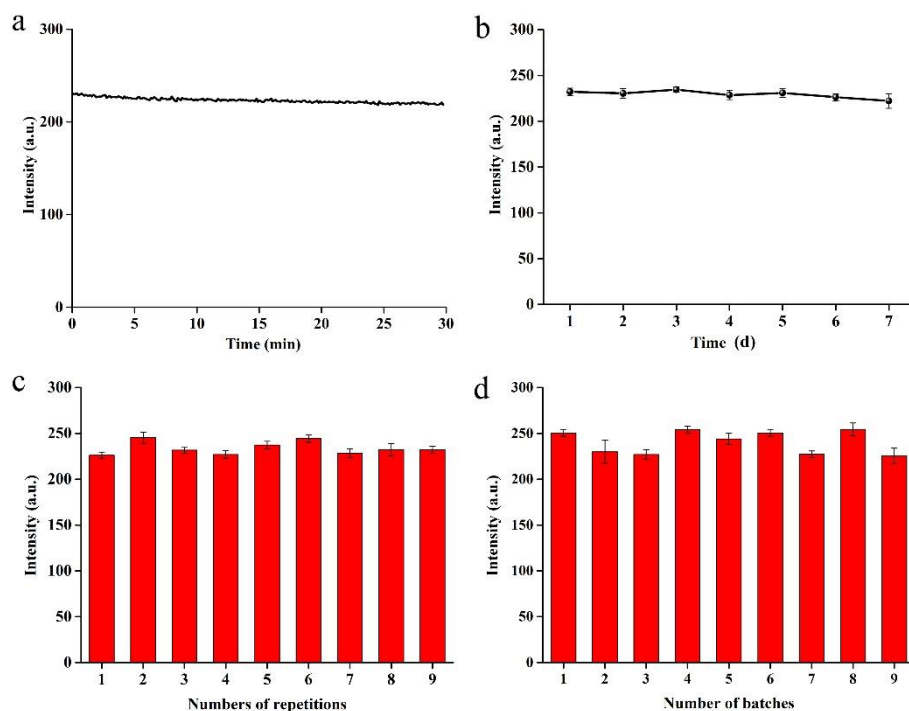

Figure S5. Variation of fluorescence intensity of AdaPOF suspension solution in 30 min (a) and 7 d (b); (b) Fluorescence stability in the same batch (c) and different batches (d) of the AdaPOF suspension solution

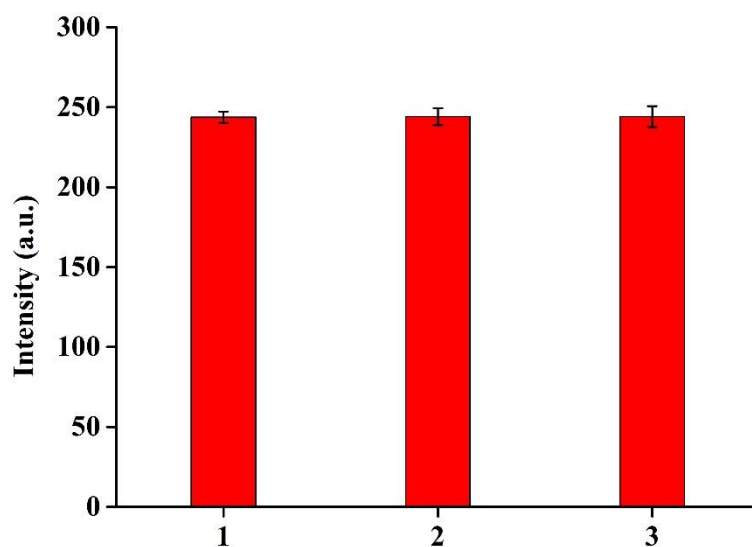

Figure S6. Variation of fluorescence intensity of AdaPOF suspension solution after methanol added (1: AdaPOF dichloromethane suspension solution; 2: AdaPOF dichloromethane/methanol (v/v=9:1) suspension solution; 3: AdaPOF dichloromethane/methanol (v/v=1:1) suspension solution)

Table S1 Responses of average fluorescence lifetimes of AdaPOF towards TC of various concentrations

| TC concentration ( $\mu\text{mol/L}$ ) | $\tau$ (ns) |
|----------------------------------------|-------------|
| 0                                      | 1.51        |
| 0.1                                    | 1.52        |
| 1.0                                    | 1.53        |
| 9.0                                    | 1.51        |

### Calculation of LOD

The LOD was calculated by testing the lowest concentration of TC solution in the linear range based on the following equations:

$$\text{LOD} = 3\sigma/S$$

Where  $\sigma$  is the standard deviation of 21 TC sample ( $0.10 \mu\text{mol/L}$ ) measurements, S is the slope of linear calibration curve.
